# Supplementary material
Source: HighWire-hosted journal article supplement (https://www.cmajopen.ca/highwire/filestream/80767/field_highwire_adjunct_files/2/open-2012-0027-03-at.pdf)
Supplement: open-2012-0027-03-at.pdf [file open-2012-0027-03-at.pdf]

**Table S3. Dialysis vintage distribution (patient count).**

| <b>Dialysis initiation year</b> | <b>Year of analysis</b> |             |             |             |             |             |             |             |
|---------------------------------|-------------------------|-------------|-------------|-------------|-------------|-------------|-------------|-------------|
|                                 | <b>2000</b>             | <b>2001</b> | <b>2002</b> | <b>2003</b> | <b>2004</b> | <b>2005</b> | <b>2006</b> | <b>2007</b> |
| <b>&lt;1999</b>                 | 1699                    | 1699        | 1265        | 944         | 718         | 562         | 449         | 366         |
| <b>1999</b>                     | 672                     | 672         | 516         | 389         | 285         | 228         | 186         | 144         |
| <b>2000</b>                     | 884                     | 884         | 701         | 551         | 431         | 351         | 270         | 208         |
| <b>2001</b>                     |                         | 977         | 921         | 729         | 540         | 419         | 342         | 280         |
| <b>2002</b>                     |                         |             | 980         | 911         | 733         | 579         | 451         | 354         |
| <b>2003</b>                     |                         |             |             | 968         | 914         | 749         | 608         | 485         |
| <b>2004</b>                     |                         |             |             |             | 949         | 893         | 711         | 568         |
| <b>2005</b>                     |                         |             |             |             |             | 972         | 919         | 760         |
| <b>2006</b>                     |                         |             |             |             |             |             | 985         | 921         |
| <b>2007</b>                     |                         |             |             |             |             |             |             | 736         |

Copyright © 2014 The Author(s) or their employer(s).  
 To receive this resource in an accessible format, please contact us at [cmajgroup@cmaj.ca](mailto:cmajgroup@cmaj.ca).
